# Supplementary material for: PARP Inhibition Activates STAT3 in Both Tumor and Immune Cells Underlying Therapy Resistance and Immunosuppression In Ovarian Cancer
Source: PubMed Central journal article supplement (PMC8693573; doi:10.3389/fonc.2021.724104), 2021-12-07
Supplement: DataSheet_1.pdf [file DataSheet_1.pdf]

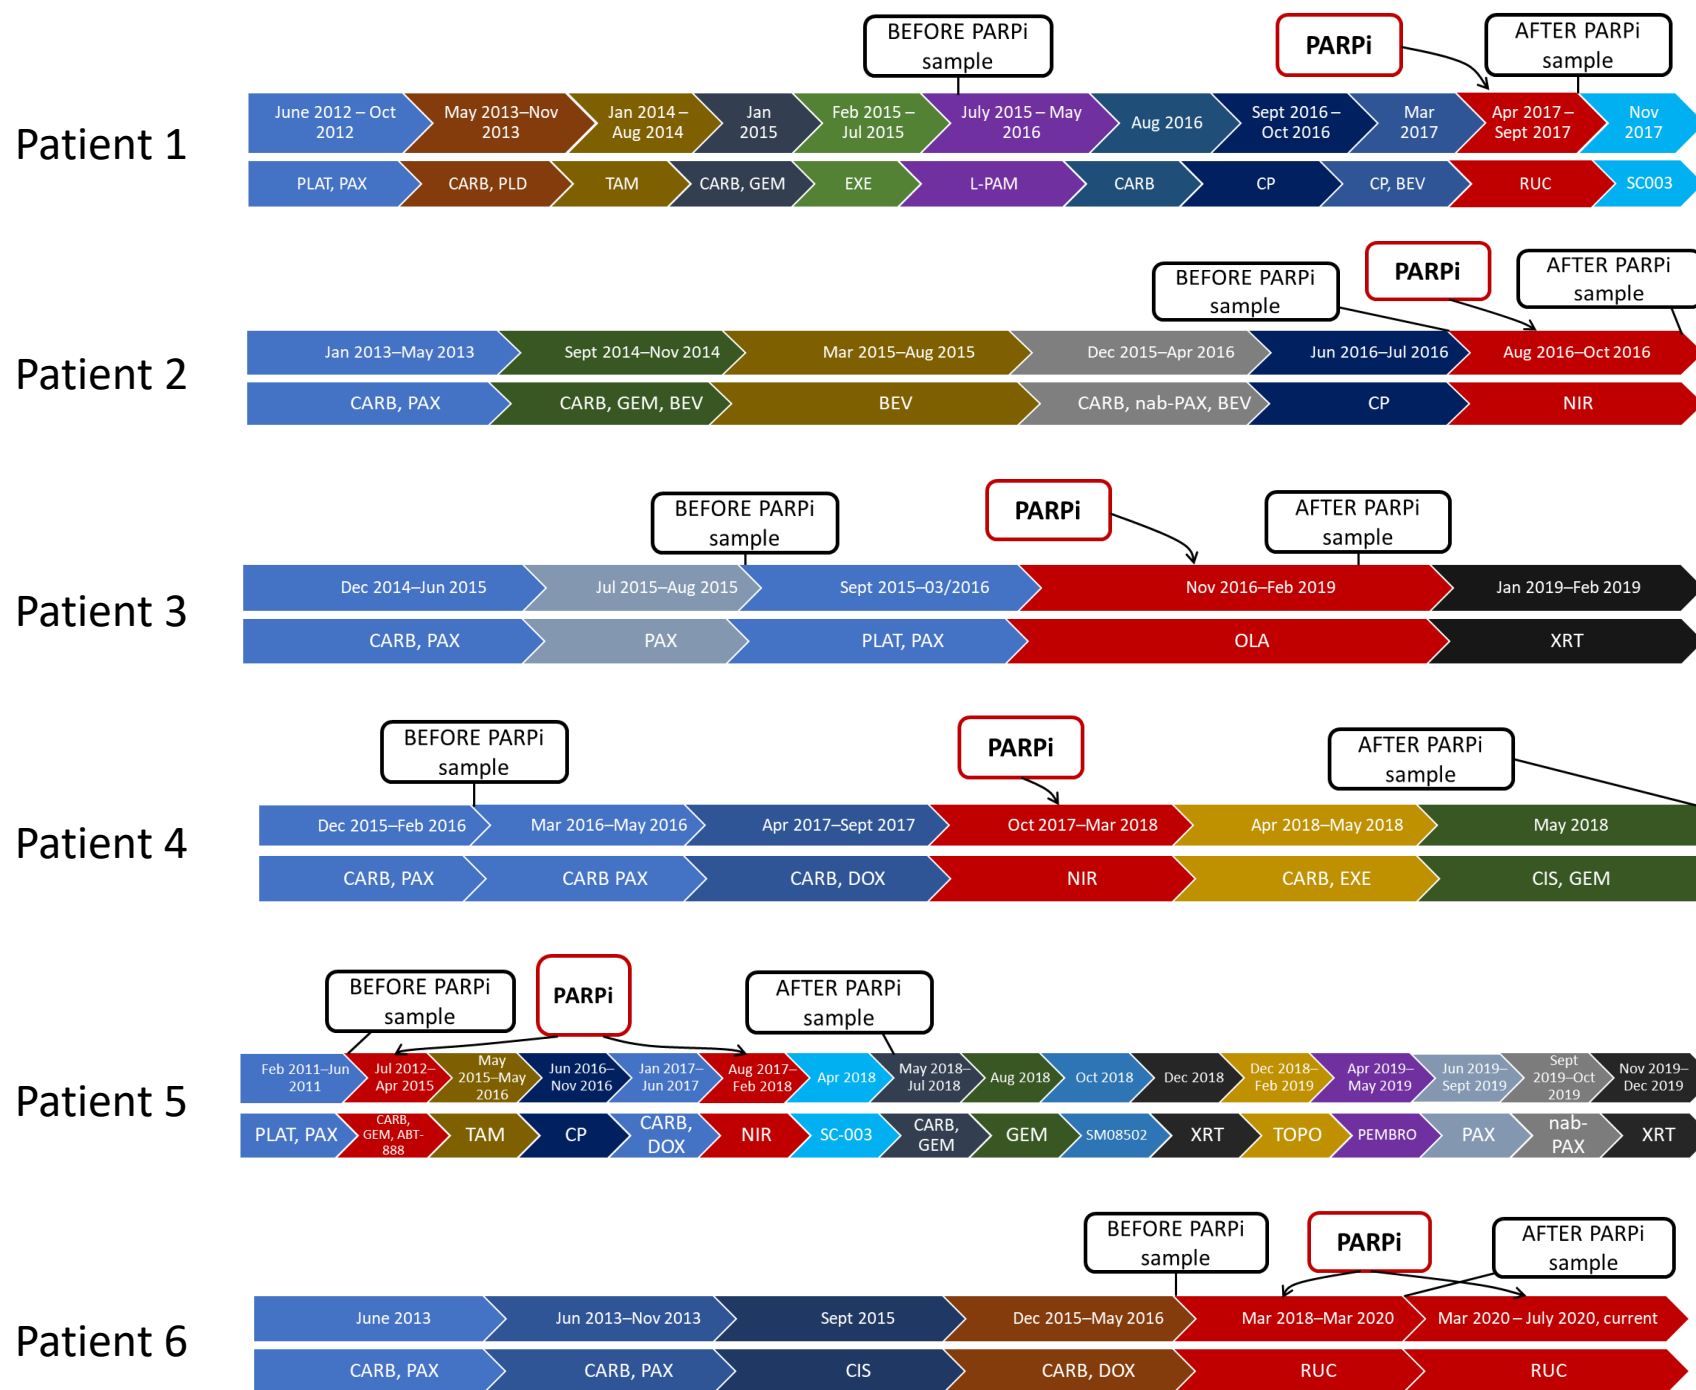

**Supplemental Figure S1. Ovarian cancer patient treatment timelines.** Related to Figures 1A and 4. The treatment history of six germline BRCA ovarian cancer patients used in this study. Indicated are time points when "Before PARPi" and "After PARPi" samples were taken, as well as the exact period of PARPi treatment course. Abbreviations: CIS, cisplatin; PLAT, platinum; PAX, paclitaxel; CARB, carboplatin; PLD, pegylated liposomal doxorubicin; TAM, tamoxifen; GEM, gemcitabine; EXE, exemestane; L-PAM, melphalan; CP, cyclophosphamide; BEV, bevacizumab; RUC, rucaparib; SC003, SC-003 antibody-drug conjugate; ABT-888, veliparib; DOX, doxorubicin; NIR, niraparib; SM08502, SM08502 CLK inhibitor; XRT, radiation, TOPO, topotecan, PEMBRO, pembrolizumab; nab-PAX, nab-paclitaxel; OLA, olaparib.

Patient 1

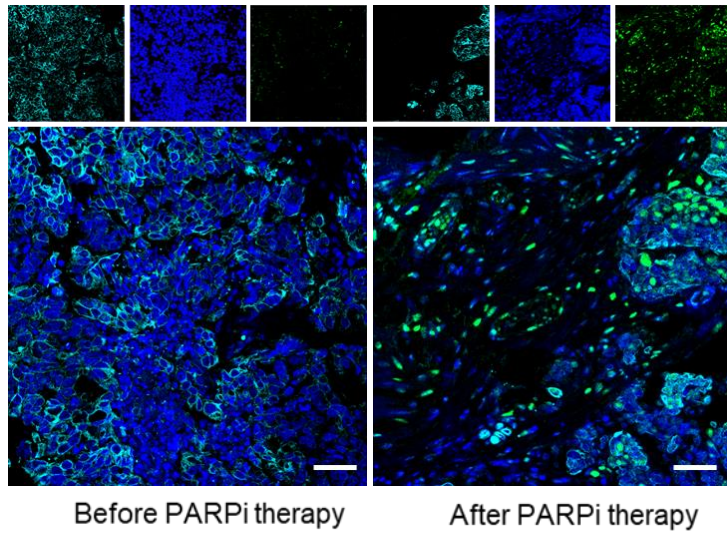

Patient 2

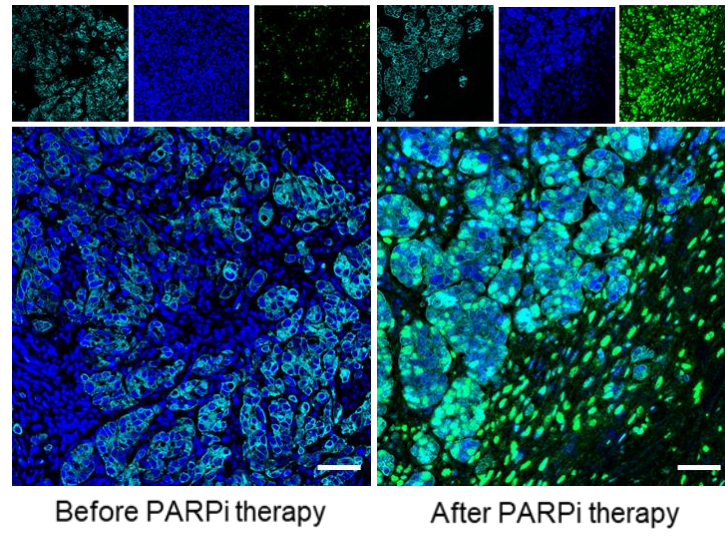

Patient 3

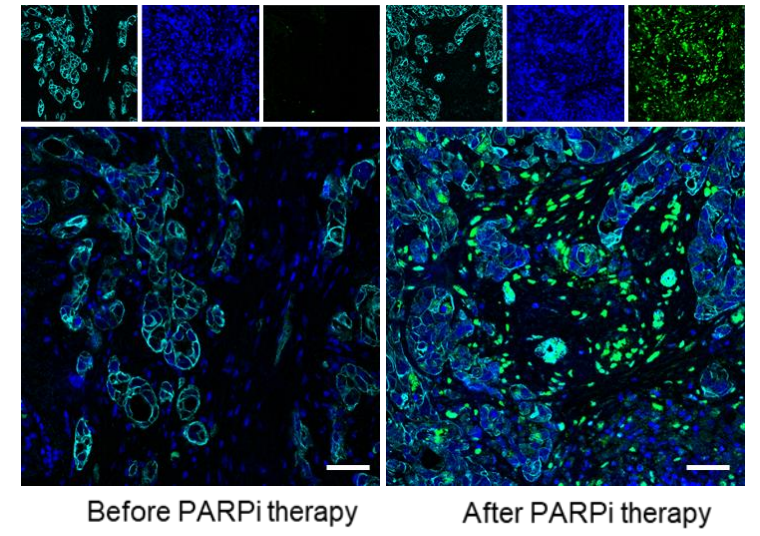

Patient 4

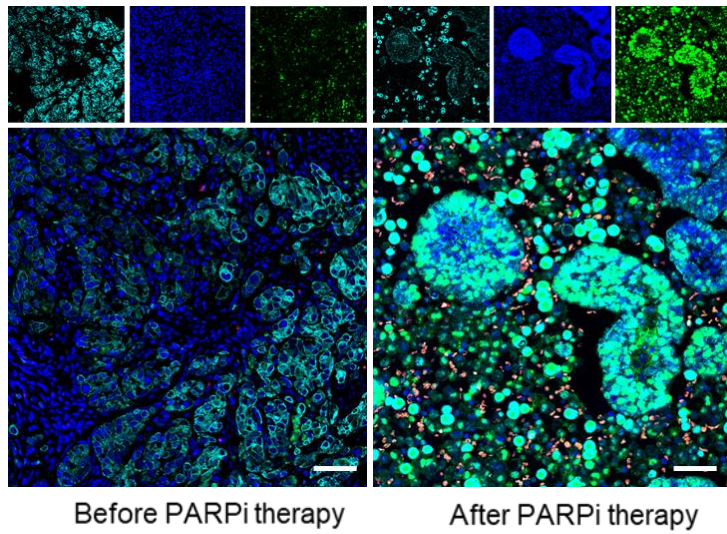

Patient 5

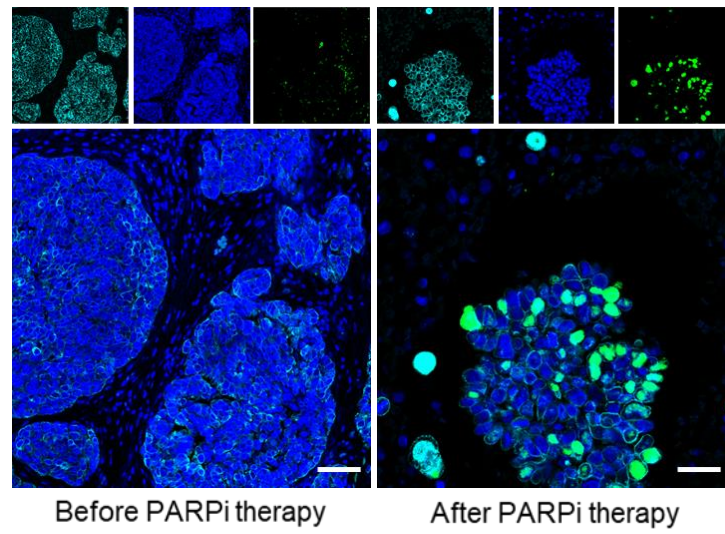

Patient 6

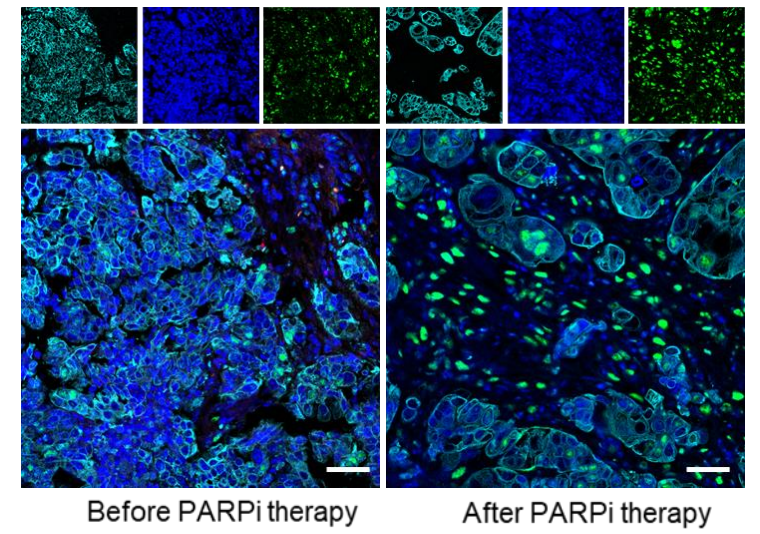

 Hoechst 33342  P-STAT3 (Y705)  pan-Cytokeratin

**Supplemental Figure S2. An increase in p-STAT3 is found in gBRCA ovarian cancer patient tumor samples post PARPi treatments.** Related to Figure 1. Representative immunofluorescence images for each of the six ovarian cancer patients with germline BRCA mutations that were stained for p-STAT3 (green), pan-Cytokeratin (cyan), and Hoechst nuclear staining (blue). Scale bars = 50  $\mu$ m

Patient 1

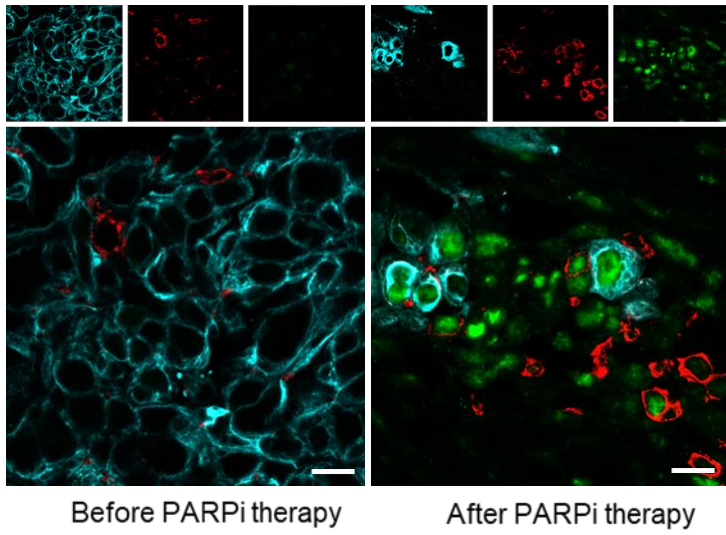

Patient 2

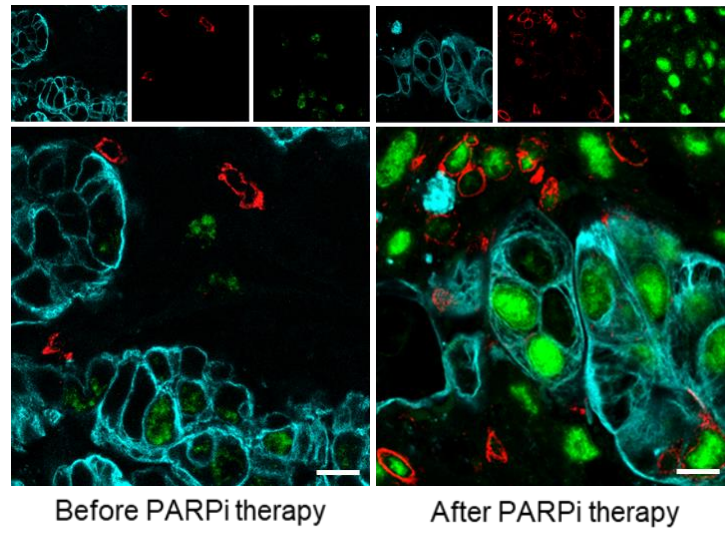

Patient 3

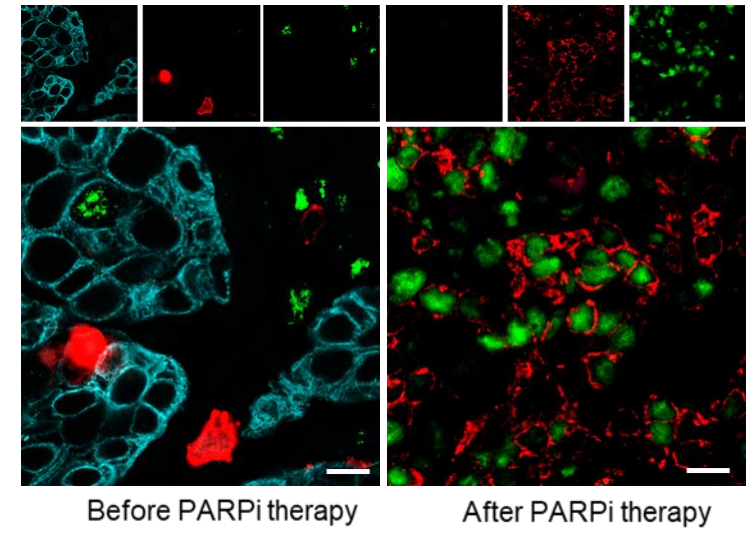

Patient 4

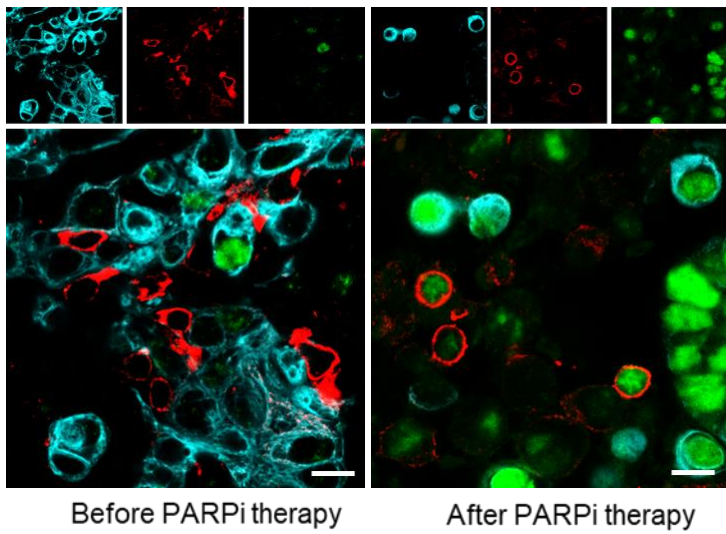

Patient 5

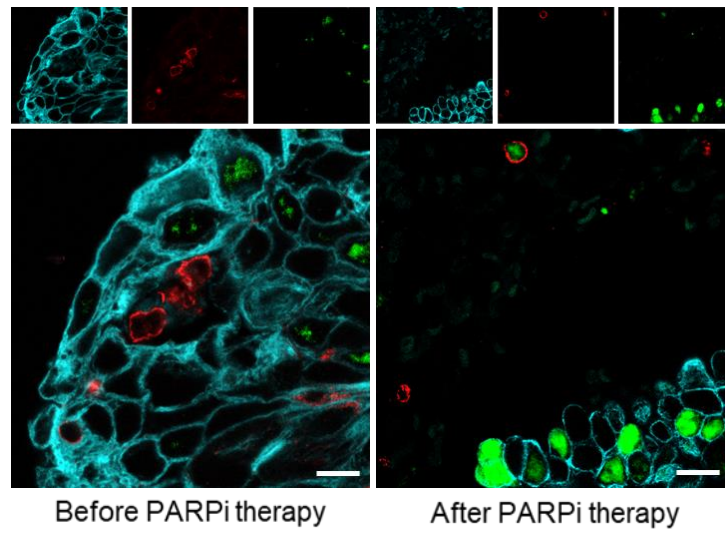

Patient 6

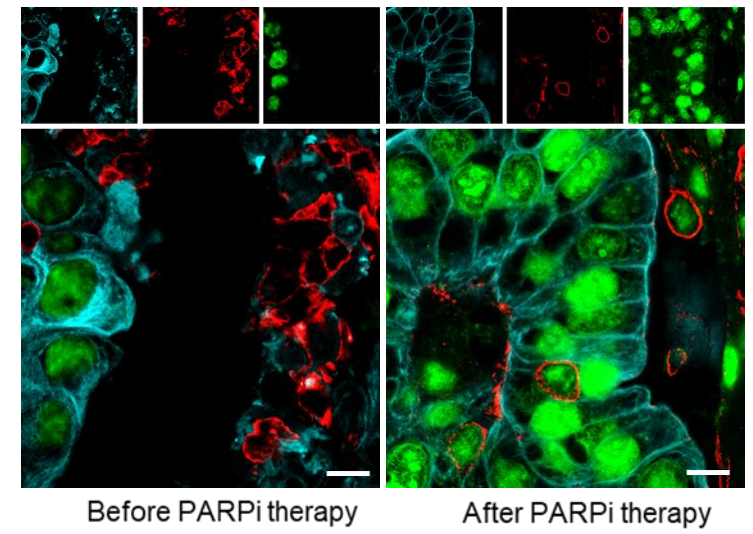

CD19 P-STAT3 (Y705) pan-Cytokeratin

**Supplemental Figure S3. PARPi treatment correlates with p-STAT3 increase in CD19+ B cells in gBRCA ovarian cancer patient tumor samples.** Related to Figure 4A. Representative immunofluorescence images for each of the six ovarian cancer patients that were stained for p-STAT3 (green), pan-Cytokeratin (cyan), and CD19 (red). Scale bars = 10  $\mu$ m.

Patient 1

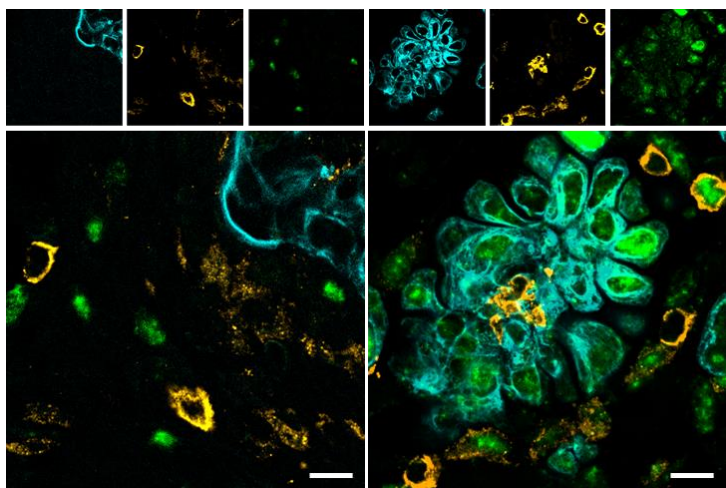

Before PARPi therapy

After PARPi therapy

Patient 2

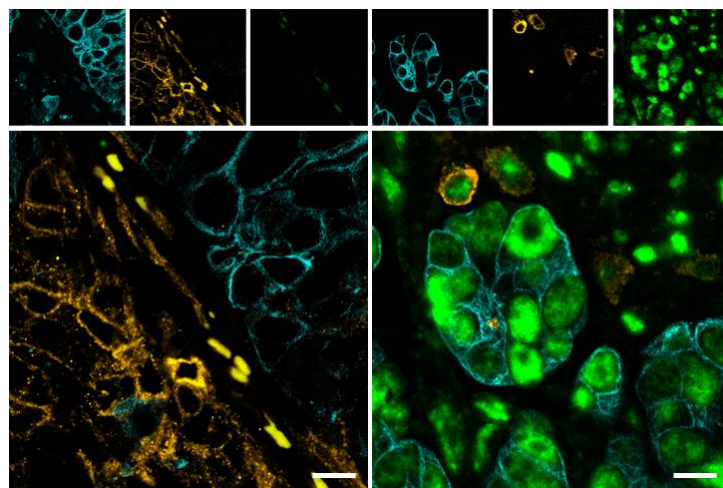

Before PARPi therapy

After PARPi therapy

Patient 3

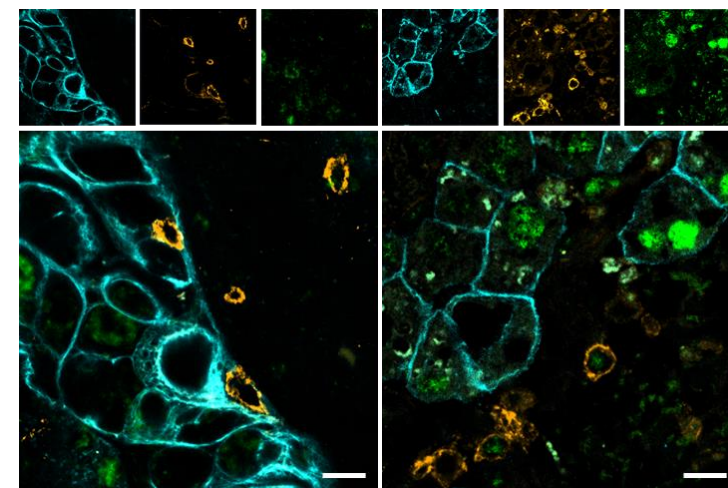

Before PARPi therapy

After PARPi therapy

Patient 4

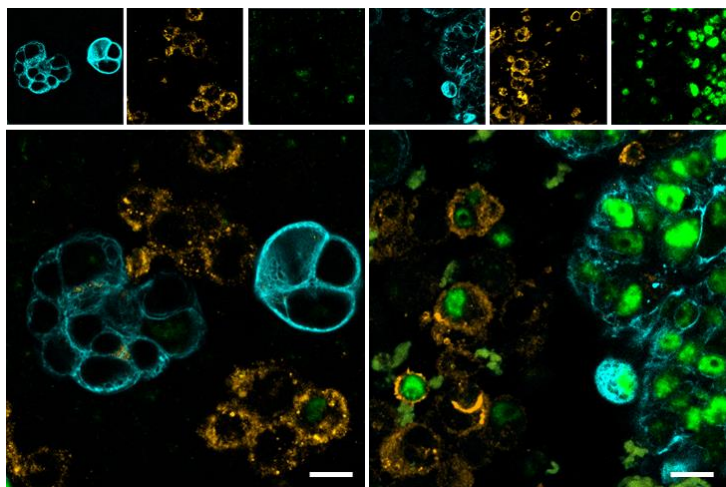

Before PARPi therapy

After PARPi therapy

Patient 5

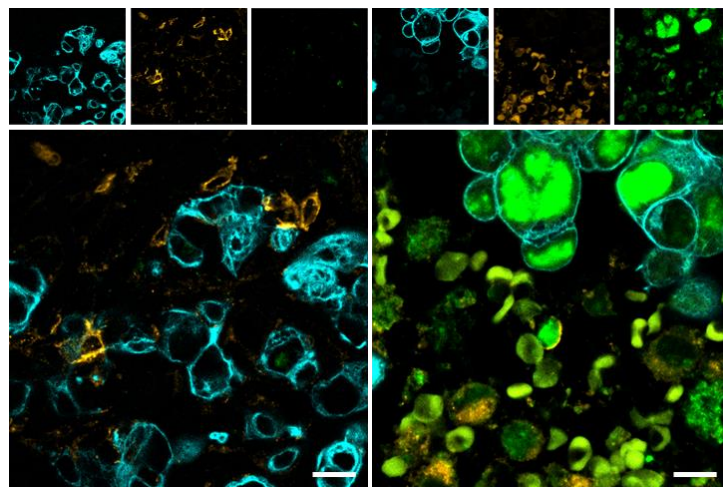

Before PARPi therapy

After PARPi therapy

Patient 6

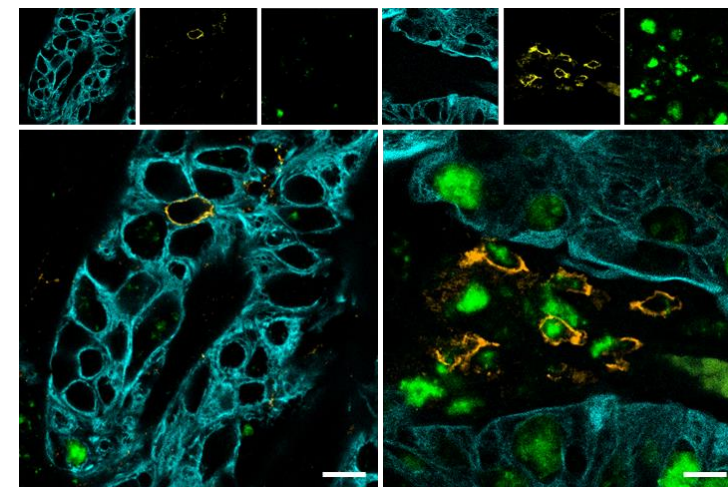

Before PARPi therapy

After PARPi therapy

CD4 P-STAT3 (Y705) pan-Cytokeratin

**Supplemental Figure S4. PARPi treatment correlates with p-STAT3 increase in CD4+ T cells in gBRCA ovarian cancer patient tumors.** Related to Figure 4B. Representative immunofluorescence images for each of the six ovarian cancer patients that were stained for p-STAT3 (green), pan-Cytokeratin (cyan), and CD4 (yellow). Scale bars = 10  $\mu$ m.



Patient 1

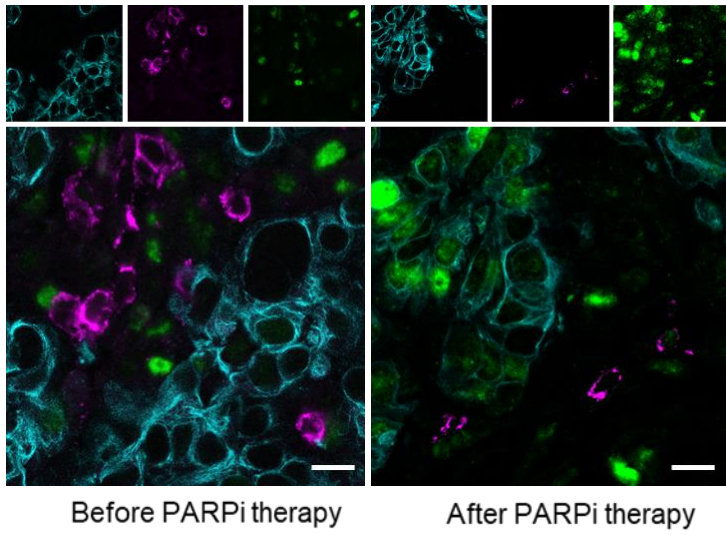

Patient 2

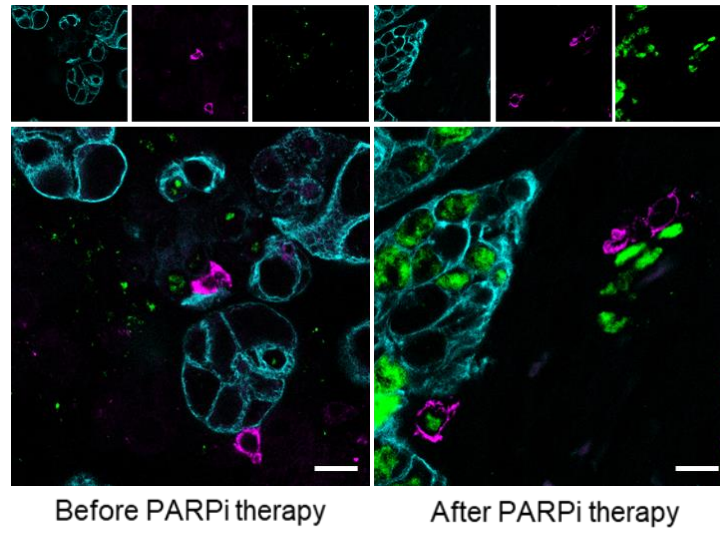

Patient 3

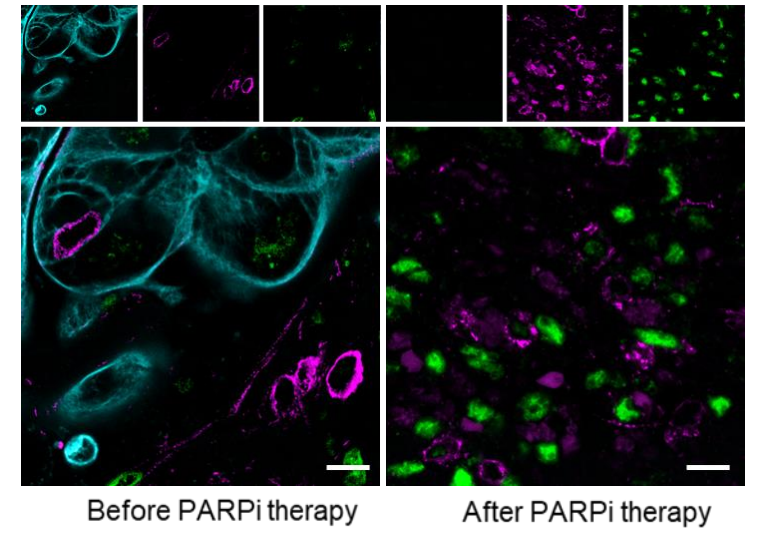

Patient 4

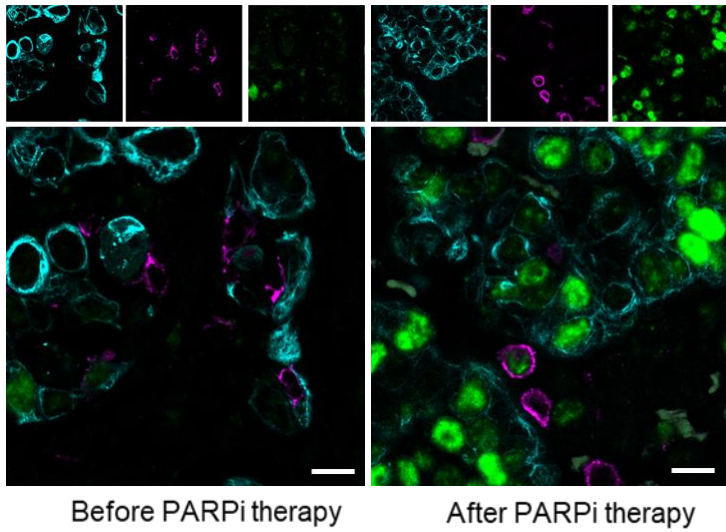

Patient 5

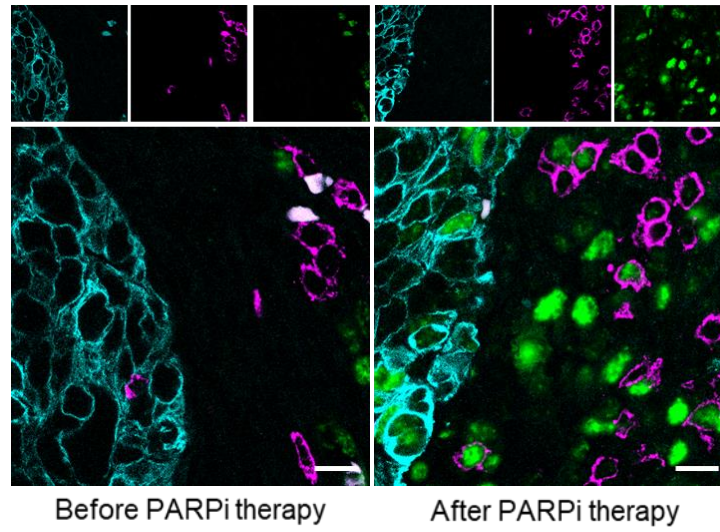

Patient 6

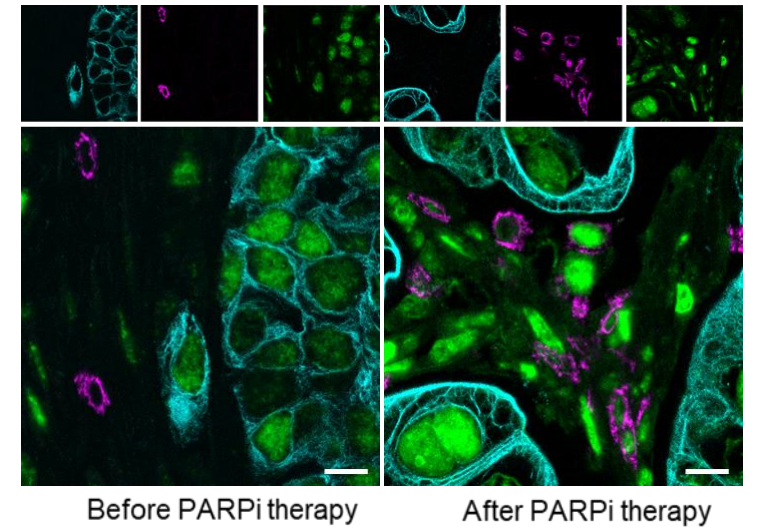

CD8 P-STAT3 (Y705) pan-Cytokeratin

**Supplemental Figure S5. p-STAT3 is increased in post-PARPi treatment patient tumor CD8+ T cells.** Related to Figure 4C. Representative immunofluorescence images for each of the six pairs of ovarian cancer patient tumors that were stained for p-STAT3 (green), pan-Cytokeratin (cyan), and CD8 (magenta). Scale bars = 10  $\mu$ m.

Patient 1

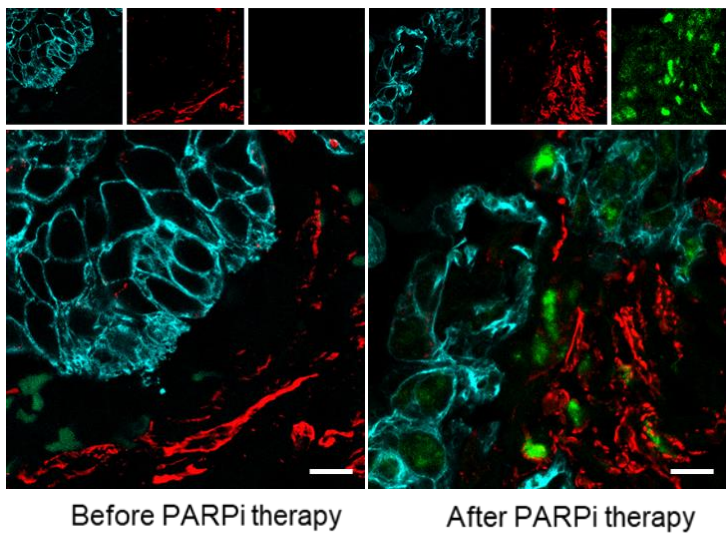

Patient 2

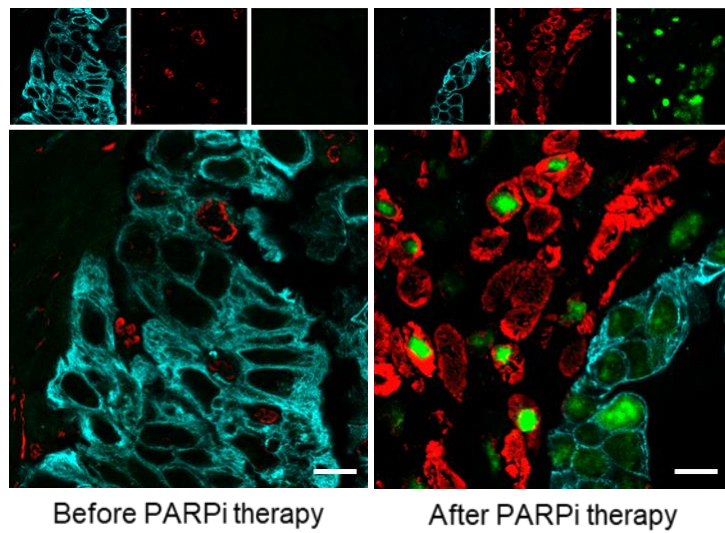

Patient 3

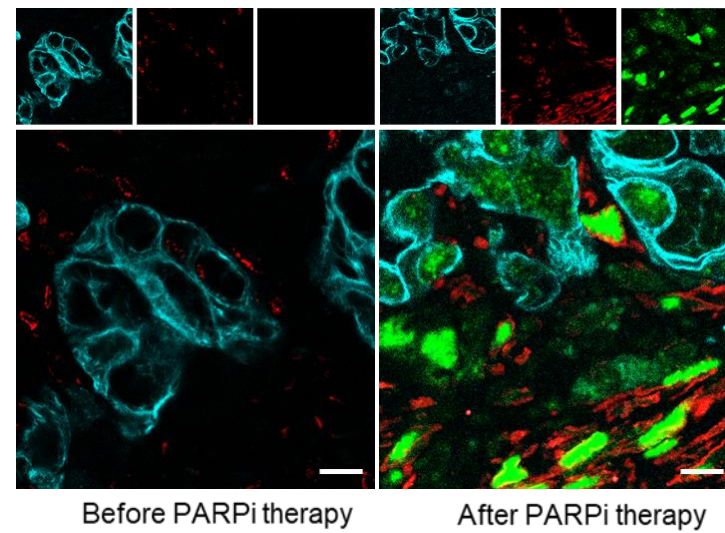

Patient 4

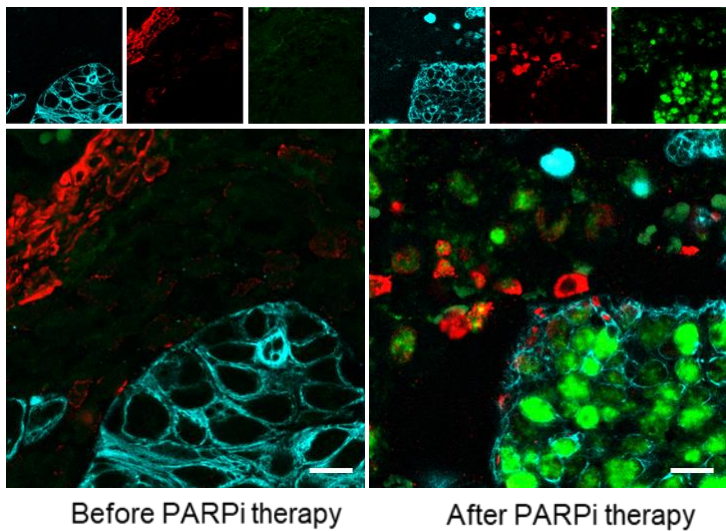

Patient 5

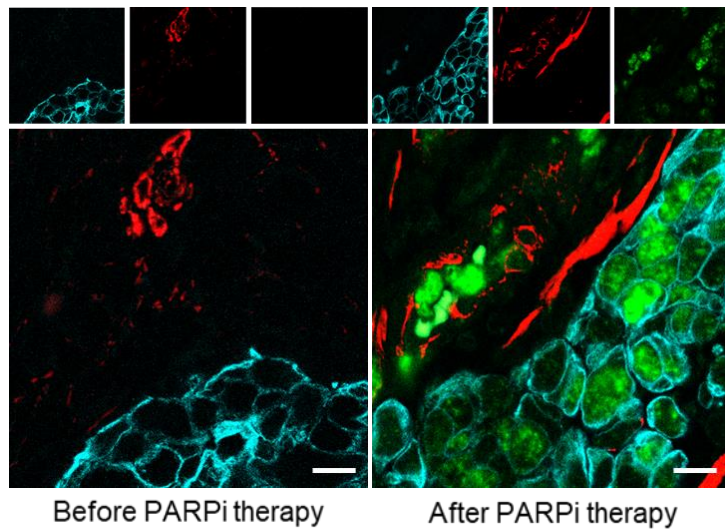

Patient 6

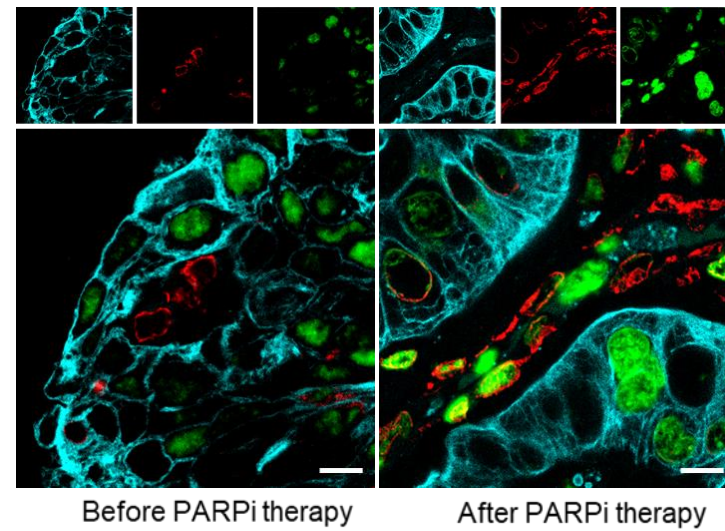

  $\alpha$ SMA  P-STAT3 (Y705)  pan-Cytokeratin

**Supplemental Figure S6. PARPi treatment correlates with p-STAT3 increase in  $\alpha$ -SMA+ fibroblasts in gBRCA ovarian cancer patient tumor samples.** Related to Figure 4D. Representative immunofluorescence images for each of the six ovarian cancer patients that were stained for p-STAT3 (green), pan-Cytokeratin (cyan), and  $\alpha$ -SMA (red). Scale bars =10  $\mu$ m.

## Supplementary Tables

**Supplementary Table 1.** Key resources table.

| Reagent                                                                | Manufacturer        | Cat. Number     |
|------------------------------------------------------------------------|---------------------|-----------------|
| Primary antibodies                                                     |                     |                 |
| anti-pY705-STAT3, rabbit monoclonal (for Western blot)                 | Cell Signalling     | 9131            |
| anti-CD4 (EP204), rabbit monoclonal                                    | Cell Marque         | 104R-24         |
| anti-CD8 (SP16), rabbit monoclonal                                     | Spring Bioscience   | M3162           |
| anti-CD19 (SP16), mouse monoclonal                                     | Bio-Rad             | MCA2454         |
| anti-STAT3 (124H6), mouse monoclonal                                   | Cell Signalling     | 9139            |
| anti-pY705-STAT3 (D3A7), rabbit monoclonal (for IF)                    | Cell Signalling     | 9145            |
| anti-Cytokeratin, pan (AE-1/AE-3) [Alexa Fluor® 647], mouse monoclonal | Novus               | NBP2-33200AF647 |
| anti-Bcl-xL, rabbit polyclonal                                         | Cell Signalling     | 2762            |
| anti-Mcl-1 (D35A5), rabbit monoclonal                                  | Cell Signalling     | 5453            |
| anti-GAPDH (6C5), mouse monoclonal                                     | SantaCruz           | sc-32233        |
| anti-VEGF (C-1), mouse monoclonal                                      | SantaCruz           | sc-7269         |
| anti- $\alpha$ -SMA (Smooth Muscle Actin), rabbit polyclonal           | Abcam               | ab5694          |
| anti-cyclin D1 (A12), mouse monoclonal                                 | SantaCruz           | sc-8396         |
| anti- $\alpha$ -Tubulin (GT114), mouse monoclonal                      | GeneTex             | GTX628802       |
| Secondary antibodies                                                   |                     |                 |
| anti-mouse IgG, HRP-linked                                             | Cytiva              | NXA931V         |
| anti-rabbit IgG, HRP-linked                                            | Cell Signalling     | 7074            |
| anti-mouse IgG, [Alexa Fluor® 555]                                     | Invitrogen          | A-31570         |
| anti-rabbit IgG, [Alexa Fluor® 555]                                    | Invitrogen          | A-31572         |
| RT-PCR primers                                                         |                     |                 |
| Human GAPDH                                                            | RealTimePrimers.com | VHPS-3541       |
| Human BIRC5                                                            | RealTimePrimers.com | VHPS-830        |
| Human MMP9                                                             | RealTimePrimers.com | VHPS-5769       |
| Human CCND1 F: 5-GAAGATCGTCGCCACCTG-3                                  | This paper          | N/A             |
| Human CCND1 R: 5-GACCTCCTCCTCGCACTTCT-3                                | This paper          | N/A             |
| Human BCL2L1                                                           | RealTimePrimers.com | VHPS-788        |
| Human VEGFA                                                            | RealTimePrimers.com | VHPS-9899       |
| Human IFNG                                                             | RealTimePrimers.com | VHPS-4477       |
| Human GZMB                                                             | RealTimePrimers.com | VHPS-3944       |
| Human IL10                                                             | RealTimePrimers.com | VHPS-4508       |
| Inhibitors                                                             |                     |                 |
| Olaparib                                                               | Selleck Chemicals   | S1060           |
| Napabucasin                                                            | Selleck Chemicals   | S7977           |
